# Supplementary material for: Is Schizophrenia a Risk Factor for Breast Cancer?—Evidence From Genetic Data
Source: Oxford University Press journal article supplement (doi:10.1093/schbul/sby162), 2018-11-07
Supplement: sby162_supplementary_table_1.docx [file sby162_supplementary_table_1.docx]

| Exposure | Exposure_samplesize | Outcome | n_clumped_snps | Egger_b | Egger_ _se | Egger_int | Egger_int_se | Egger_int_pval | ivw.r_beta | ivw.r_se | ivw.pval |
| --- | --- | --- | --- | --- | --- | --- | --- | --- | --- | --- | --- |
| schizophrenia | 123575 | breast cancer | 218 | 0.061 | 0.022 | -4.67E-05 | 0.001 | 0.950 | 0.061 | 0.007 | 4.17E-15 |
| breast cancer | 228951 | schizophrenia | 283 | 0.010 | 0.018 | 0.001 | 0.001 | 0.444 | 0.010 | 0.010 | 0.331 |

Supplementary Table 1. Results from Mendelian Randomisation analysis of schizophrenia and breast cancer using the Inverse-variance Weighted Meta Analysis and MR-EGGER methods
